# Supplementary material
Source: publisher figshare collection journal article supplement (https://tandf.figshare.com/ndownloader/files/14885795)
Supplement: Supplementary file 1 [file 14885795]

**Supplementary Figure 1.** Risk for severe morbidity for patients with a preeclampsia diagnosis

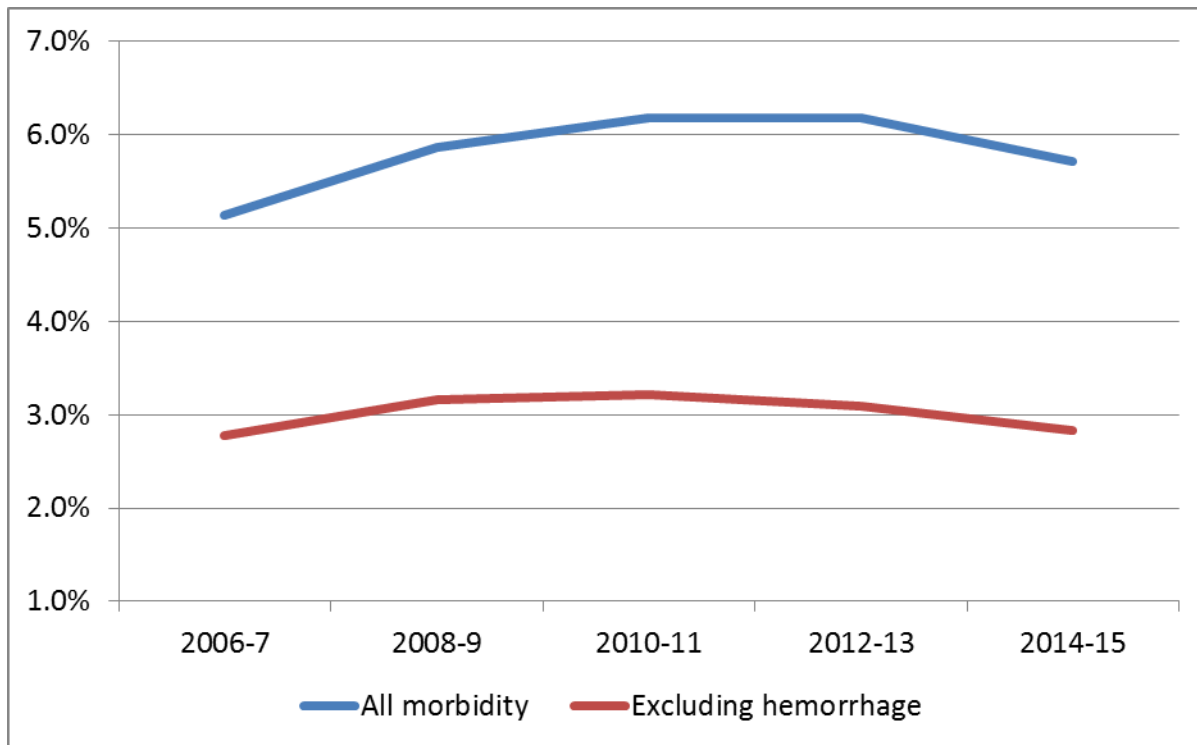

**Legend:** The figure demonstrates risk for severe morbidity risk based on CDC criteria associated for women with a delivery hospitalization complicated preeclampsia. The top line represents all severe morbidity in the CDC composite. The lower line represents all diagnoses with the exception of transfusion.
